# Supplementary material for: Novel hydrogen chemisorption properties of amorphous ceramic compounds consisting of p-block elements: exploring Lewis acid–base Al–N pair sites formedin situwithin polymer-derived silicon–aluminum–nitrogen-based systems
Source: Royal Society of Chemistry journal article supplement (doi:10.1039/d0ta10271g), 2020-12-19
Supplement: d0ta10271g1.pdf [file d0ta10271g1.pdf]

## Supplementary Information

### Novel hydrogen chemisorption properties of amorphous ceramic compounds consisting of *p*-block elements: exploring Lewis acid-base Al–N pair site formed *in-situ* within polymer-derived silicon-aluminum-nitrogen-based system

Shotaro Tada,<sup>a</sup> Norifumi Asakuma,<sup>a</sup> Shiori Ando,<sup>a</sup> Toru Asaka,<sup>a</sup> Yusuke Daiko,<sup>a</sup> Sawao Honda,<sup>a</sup> Masaaki Haneda,<sup>a</sup> Samuel Bernard,<sup>b</sup> Ralf Riedel<sup>c</sup> and Yuji Iwamoto<sup>\*a</sup>

<sup>a</sup>Department of Life Science and Applied Chemistry, Graduate School of Engineering, Nagoya Institute of Technology, Gokiso-cho, Showa-ku, Nagoya 466-8555, Japan

<sup>b</sup>University of Limoges, CNRS, IRCER, UMR 7315, F-87000, Limoges, France

<sup>c</sup>Institut für Materialwissenschaft, Technische Universität Darmstadt, Otto-Berndt-Str. 3, 64287 Darmstadt, Germany

\* Corresponding author: Yuji Iwamoto

E-mail: [iwamoto.yuji@nitech.ac.jp](mailto:iwamoto.yuji@nitech.ac.jp)

Tel/Fax: +81-52-735-5276

#### Keywords:

Polymer-Derived Ceramics (PDCs) / amorphous SiAlN / Molecular hydrogen (H<sub>2</sub>) chemisorption / CO<sub>2</sub> hydrogenation reactions / Lewis acid-base pair site

In this study, aluminum (Al)-modified polysilazane, as a single-source precursor, was first synthesized by chemical modification of a commercially available Durazane<sup>®</sup> 1800, poly(vinylmethyl-co-methyl)silazane (PSZ, silicon nitride precursor) with alane *N,N*-dimethylethylamine (EtNMe<sub>2</sub>·AlH<sub>3</sub>—ADMEA). The reaction of PSZ and ADMEA relies on both dehydrocoupling and hydroalumination reactions (Fig. S1).

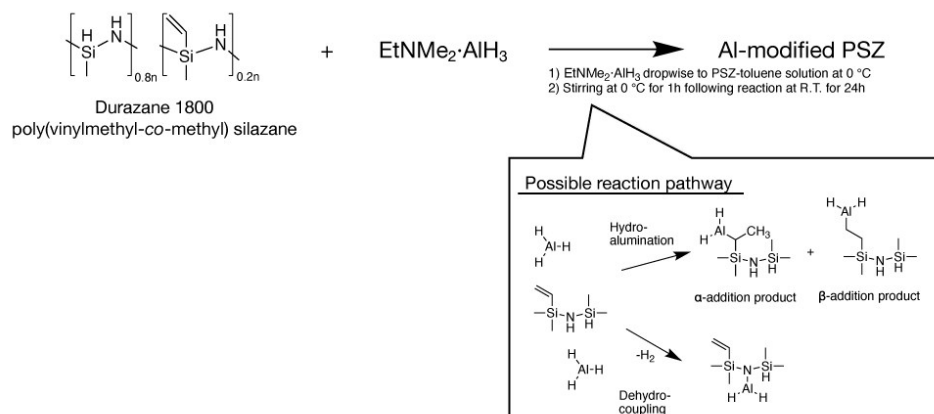

**Fig. S1** Schematic representation of the synthesis of Al-modified PSZ through PDCs route.

The chemical modification performed in this study was monitored by attenuated total reflection fourier transform infra-red (ATR-FTIR) spectroscopy using FTIR spectrometer (FT/IR-4200IF, JASCO Corporation, Tokyo, Japan) with attachment of ATR equipment (ATR PRO 550S-S/570S-H, JASCO Corporation, Tokyo, Japan) at a resolution of  $4\text{ cm}^{-1}$ . The typical ATR-FTIR spectra of Al-PSZ samples with different Al/Si atomic ratios shows in Fig. S2. The FT-IR spectra shows that the intensity of the bands corresponding to the  $C_{sp^2}$ -H band at  $3048$  and  $1402\text{ cm}^{-1}$  slightly reduces. In parallel, the intensity of the bands assigned to N-H bands at  $3381$  and  $1173\text{ cm}^{-1}$  reduces more significantly. These changes indicate both hydroalumination and dehydrocoupling reaction occur in parallel. FTIR (ATR/ $\text{cm}^{-1}$ ):  $\nu$  (N-H) =  $3350$  (m);  $\nu$  ( $C_{sp^2}$ -H) =  $3048$  (w);  $\nu$  ( $C_{sp^3}$ -H) =  $2950$  (m),  $2900$  (vw);  $\nu$  (Si-H) =  $2130$  (vs);  $\nu$  (Al-H) =  $1820$  (m);  $\nu$  (C=C) =  $1596$  (vw);  $\delta$  (C-C, vinyl) =  $1402$  (w);  $\delta$  (Si-CH<sub>3</sub>) =  $1250$  (vs);  $\delta$  (Si<sub>2</sub>N-H) =  $1175$  (vs);  $\delta$  (Si-N) =  $840$ – $1020$  (vs); and  $\delta$  (Si-C) =  $700$ – $850$  (m).

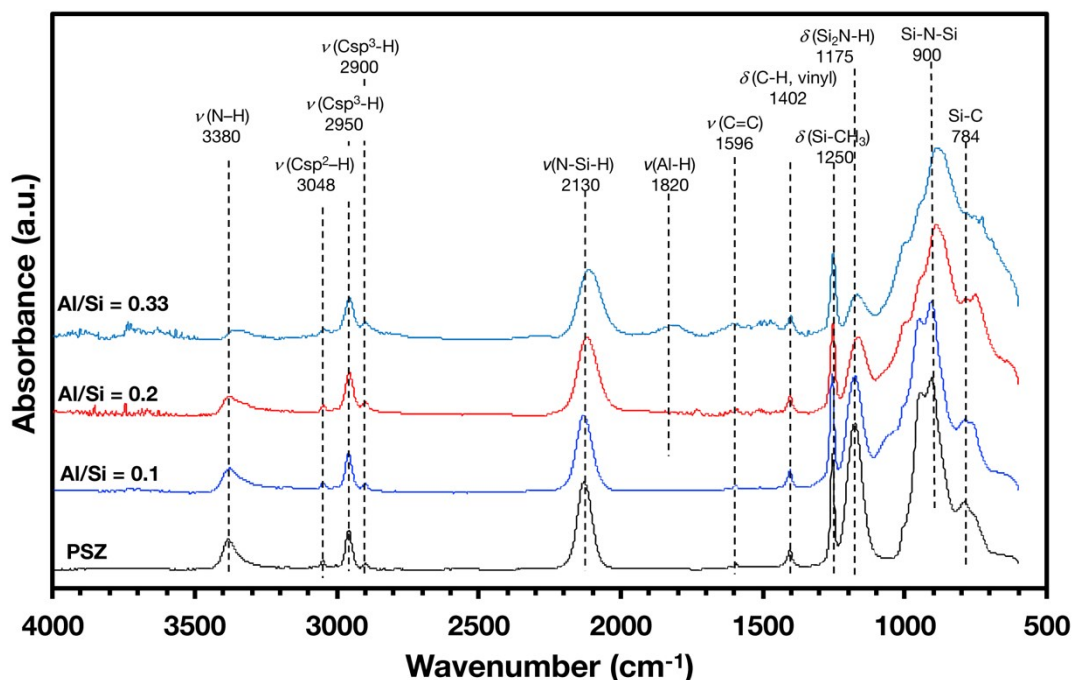

**Fig. S2** ATR-FT-IR spectra for as-received PSZ and Al-modified PSZ.

In this study, Al-PSZ was pyrolyzed at 1000 °C under flowing ammonia (NH<sub>3</sub>) to generate a silicon-aluminum-nitrogen-based ceramic. Powder X-ray diffraction (XRD) patterns of the pyrolyzed samples were measured on a flat sample stage, using Ni-filtered CuK $\alpha$  radiation (Model X'pert, Philips, Amsterdam, The Netherlands). The XRD patterns of as-pyrolyzed samples are shown in Fig. S3. The XRD pattern of as-pyrolyzed SiAlN (**SiAlN**) is X-ray amorphous and does not show any difference with the Al-free sample, *i.e.*, the as-pyrolyzed silicon nitride (**SiN**) sample, prepared through the same pyrolysis procedure.

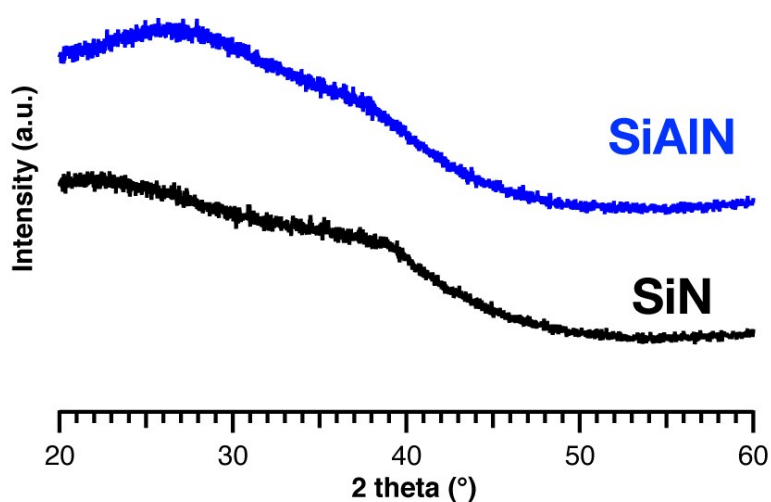

**Fig. S3** Typical XRD patterns of samples after pyrolysis at 1000 °C under flowing NH<sub>3</sub>.

Textural properties of pyrolyzed samples was evaluated by measuring N<sub>2</sub> adsorption and desorption isotherms at -196 °C under the relative pressures ranging from 0 to 0.99 (Model Belsorp Max, BEL Japan Inc., Osaka, Japan). The pore size distribution was analyzed by MP<sup>1</sup> and BJH<sup>2</sup> methods. The results are shown in Fig. S4. The **SiAlN** sample at -196 °C exhibited a type I+IV isotherms according to the IUPAC classifications<sup>3,4</sup>, while the **SiN** sample showed no interaction with N<sub>2</sub> (Fig. S4a). The Brunauer-Emmett-Teller (BET) surface area ( $S_{BET}^{N_2}$ ) of the **SiAlN** sample has been measured to be 165 m<sup>2</sup> g<sup>-1</sup>. The pore size distribution curve (PSD) in the micropore range characterized by the MP meshod<sup>1</sup> exhibited a peak centered at 1.2 nm (Fig. S4b), whereas there was no distinct peak in the mesopore range by the BJH plot<sup>2</sup> although we can identify the existence of a certain porosity with a pore size range of approximately 2 to 4 nm (Fig. S4c). In addition, Fig. S5 shows a N<sub>2</sub> adsorption and desorption isotherm of the

SiAlN sample pyrolyzed at 700 °C which has low porosity due to the collapse and close of the pore.

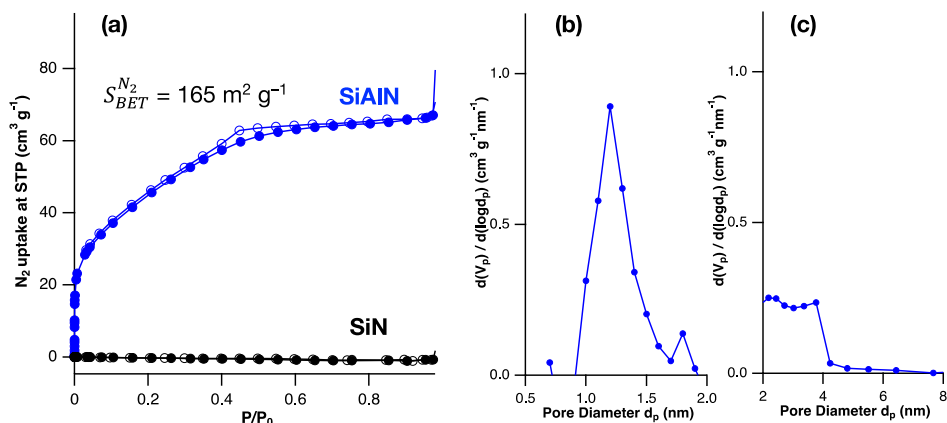

**Fig. S4** (a) N<sub>2</sub> adsorption-desorption isotherms at –196 °C for the polymer-derived amorphous SiAlN and SiN samples, and pore size distribution curves of the SiAlN sample characterized by (b) MP plot and (c) BJH plot.

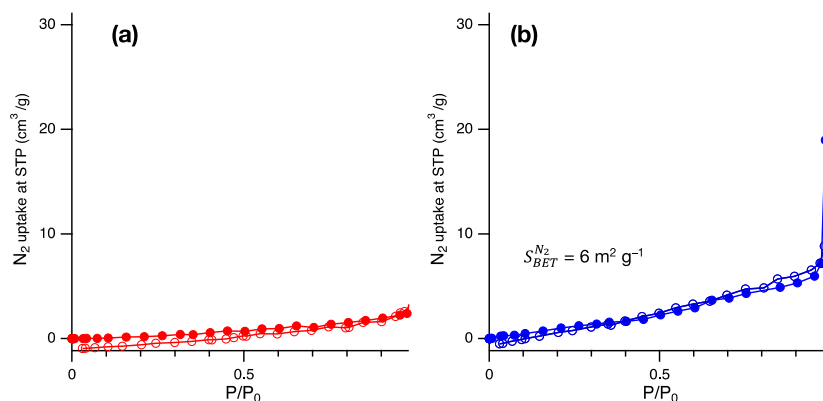

**Fig. S5** Reference data of N<sub>2</sub> adsorption and desorption isotherms at –196 °C. Polymer-derived SiAlN pyrolyzed (a) at 1000 °C under N<sub>2</sub> and (b) at 700 °C under NH<sub>3</sub>.

Thermalgravimetric (TG) analysis for the polymer-to-ceramic conversion was performed under flowing mixture of NH<sub>3</sub> and N<sub>2</sub> (60:40 in flow ratio) (Model TGA 92 16.18 Setaram, Inc., Newark, CA, USA) or He (Model JMS-Q1500GC, JEOL Ltd., Tokyo, Japan). The TG-curves under the mixed NH<sub>3</sub>-N<sub>2</sub> gas flow were monitored up to 1000 °C with a heating rate of 5 °C min<sup>-1</sup> (Fig. S6), while those under He flow were monitored up to 1000 °C with a heating rate of 10 °C min<sup>-1</sup> (Fig. S7).

A contentious weight loss above 700 °C is identified during the conversion of the Al-modified PSZ leading to the SiAlN sample whereas no weight loss is identified above 800 °C during the conversion of PSZ into the SiN sample (Fig. S6), in contrast, such the difference

above 800 °C is not observed when the conversions of Al-modified PSZ and PSZ were monitored under He (Fig. S7).

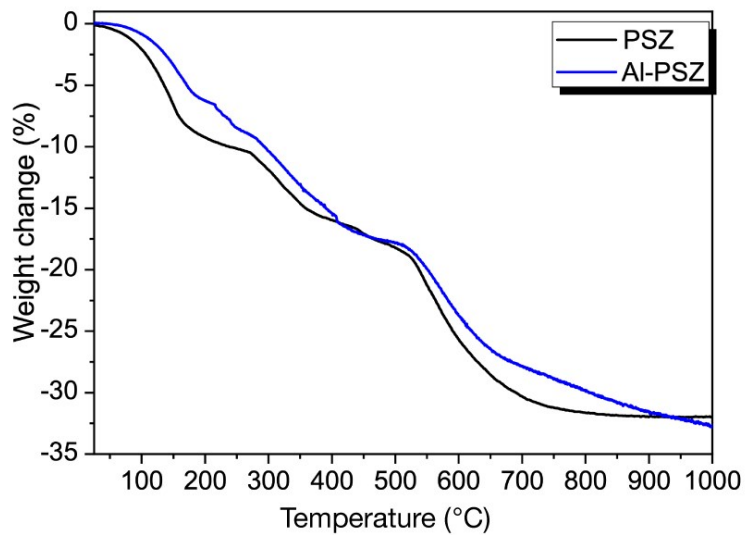

**Fig. S6** TG-curves of PSZ and Al-PSZ under flowing  $\text{NH}_3\text{-N}_2$  (60:40 in flow ratio) mixed gas.

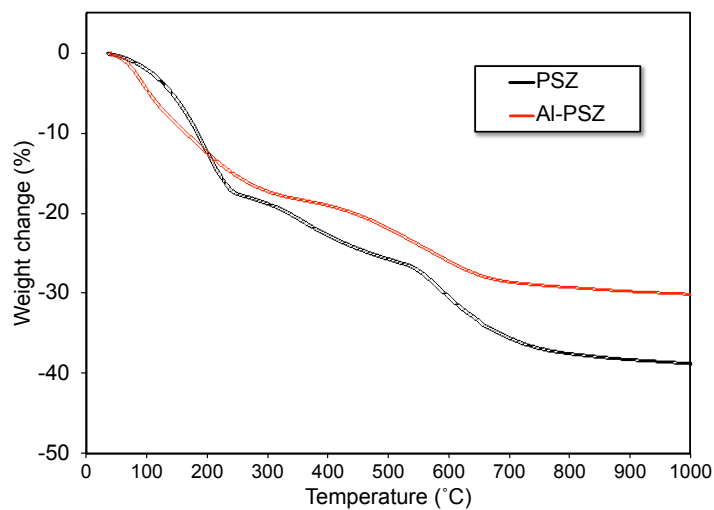

**Fig. S7** TG-curves of PSZ and Al-PSZ under flowing He.

To investigate the chemical bonding-state of the **SiAlN** sample, X-ray photoelectron spectroscopic (XPS) measurements were performed using X-ray Photoelectron Spectrometer (PHI 5000, ULVAC-PHI, Inc., Japan) with an Al  $K\alpha$  X-ray source operated at 14 kV and 14 mA. An alignment on the C 1s peak was performed before survey scans. The wide scan spectrum of **SiAlN** sample is shown in Fig. S8. Besides the intense lines of the constituent elements (N 1s, Si 2p and Al 2p) and unavoidable carbon contaminant, strong line of O 1s is observed. This indicates a certain amount of oxygen is present at the surface of the **SiAlN** sample. The summary of XPS characterization for amorphous SiAlN sample lists in Table S2.

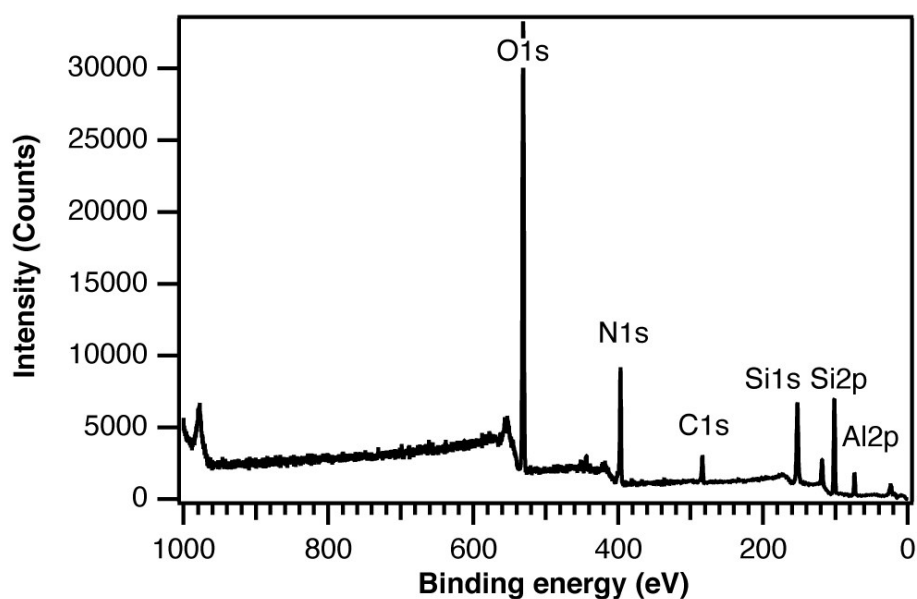

**Fig. S8** Wide scan x-ray photoelectron spectrum of polymer-derived SiAlN.

**Table S1** Summary of XPS characterization for amorphous SiAlN sample.  
(a) Al 2p and (b) Si 2p.

| (a) | Band (Al 2p) | Binding energy (eV) | Area (%) |
|-----|--------------|---------------------|----------|
|     | Al-N         | 73.5                | 78.0     |
|     | Al-O         | 74.7                | 22.0     |
| (b) | Band (Si 2p) | Binding energy (eV) | Area (%) |
|     | Si-N         | 73.5                | 98.8     |
|     | Si-O         | 74.7                | 1.2      |

To study the H<sub>2</sub> adsorption and desorption properties, temperature-programmed-desorption of hydrogen (H<sub>2</sub>-TPD) was performed using a catalyst analyzer (Model BELCAT-A, MicrotracBEL Corp., Osaka, Japan) fixed with a quadrupole mass spectrometer (Model BELMASS, MicrotracBEL Corp., Osaka, Japan). Prior to the measurement, the sample was maintained under Ar at 800 °C and subsequently exposed to H<sub>2</sub> at specific temperatures ( $T_{H_2} = 100, 150$  °C) for 5 min. H<sub>2</sub>-TPD profiles of the reference samples are shown in Fig. S9. The amorphous silicon nitride which is derived from the as-received PSZ, commercial crystalline AlN and HY zeolite samples show no desorption peak under the measurement condition ( $T_{H_2} = 150$  °C), while the H<sub>2</sub>-TPD profiles of the **H<sub>2</sub>PTSiAlN** sample exhibits a single peak at approximately 100 to 350 °C under the same condition ( $T_{H_2} = 150$  °C). As referential data, the volumetric amount of hydrogen desorption briefly estimated for the **H<sub>2</sub>PTSiAlN** sample is approximately 1.1 mL g<sup>-1</sup> which was calculated based on the relative ratio of the peak area of H<sub>2</sub>-TPD curve,  $T_{H_2} = 150$  °C in Fig. S9, to that of well-known metal hydride, MgH<sub>2</sub> measured at our lab.

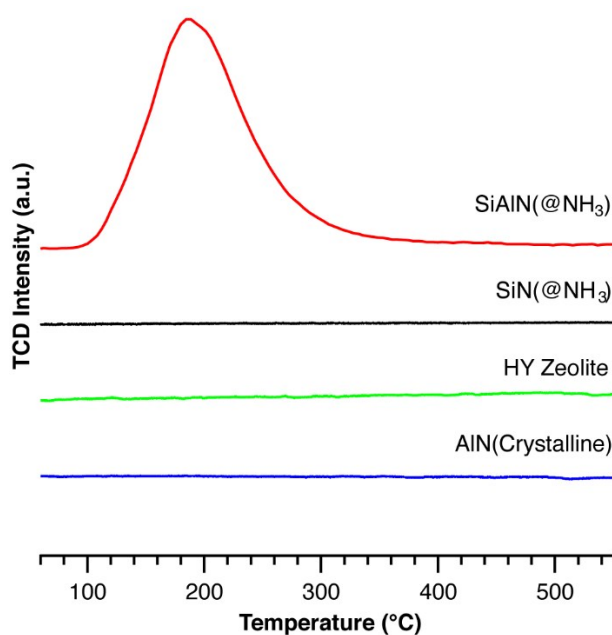

**Fig. S9** Comparison of H<sub>2</sub>-TPD profiles of **PTSiAlN** sample with those of reference samples of **SiN** sample, commercially available crystalline AlN and zeolite samples.

## References

1. R. S. Mikhail, S. Brunauer and E. E. Bodor, Investigations of a complete pore structure analysis. I. Analysis of micropores, *J. Colloid Interface Sci.*, 1968, **26**, 45–53.
2. E. P. Barrett, L. G. Joyner and P. P. Halenda, The Determination of Pore Volume and Area Distributions in Porous Substances. I. Computations from Nitrogen Isotherms, *J. Am. Chem. Soc.*, 1951, **73**, 373–380.
3. K. S. W. Sing, D. H. Everett, R. A. W. Haul, L. Moscou, R. A. Pierotti, J. Rouquerol and T. Siemieniewska, Reporting Physisorption Data for Gas/Solid Systems with Special Reference to the Determination of Surface Area and Porosity, *Pure Appl. Chem.*, 1985, **57**, 603–619.
4. S. Lowell, J. E. Shields, M. A. Thomas and M. Thommes, Springer, Dordrecht, 2004, pp. 129–156.
